# Supplementary material for: Cardiac events in patients with acute myeloid leukemia treated with venetoclax combined with hypomethylating agents
Source: PubMed Central journal article supplement — Blood Adv. 2022 Sep 12;6(17):5227–31. doi: 10.1182/bloodadvances.2022007333 (PMC9631636; doi:10.1182/bloodadvances.2022007333), 2022-09-12

**Supplemental Table 1. Details in regard to timing, blood counts and status of AML in 34 patients who experienced a cardiac event**

| Type of event                                                                                                                | Context                                    | Timing   | Upfront vs. R/R | Blood counts at time of event         | Status of AML at time of event | Ven dose (if reduced which concomitant med) | HMA or schedule adjustment?                   | Infection at time of event?                                | If troponin elevation or RV dysfunction: clinical scenario? | CTCAE grade                                                           | EF    |
|------------------------------------------------------------------------------------------------------------------------------|--------------------------------------------|----------|-----------------|---------------------------------------|--------------------------------|---------------------------------------------|-----------------------------------------------|------------------------------------------------------------|-------------------------------------------------------------|-----------------------------------------------------------------------|-------|
| Patient (PT) 1<br>69 F: Atrial fibrillation with rapid ventricular response                                                  | Neutropenic fever                          | Cycle 2  | R/R             | WBC:<br>0.1<br>Hb:<br>8.4<br>Pit: 27  | Not assessed                   | 200mg (fluconazole)                         | No                                            | Pneumonia (based on imaging, not culture-proven)           |                                                             | 3                                                                     | 66    |
| PT 2<br>92 M: LVEF decrease <sup>†</sup> , Atrial fibrillation with rapid ventricular response, other symptomatic arrhythmia | Acute hypoxic respiratory failure          | Cycle 22 | Upfront         | WBC:<br>0.7<br>Hb:<br>6.4<br>Pit: 10  | PR                             | 400mg (no concurrent meds)                  | C4 delayed for neutropenic fever              | COVID with superimposed bacterial pneumonia                |                                                             | Atrial fibrillation: 5<br>LVEF: 3<br>Other arrhythmia: 2              | 36    |
| PT 3<br>81 F: Troponin elevation, Worsening HFpEF, Atrial fibrillation with rapid ventricular response                       | Tumor lysis syndrome                       | Cycle 1  | Upfront         | WBC:<br>2.8<br>Hb:<br>7.8<br>Pit: 33  |                                | 200mg (fluconazole)                         | None                                          | No                                                         | Chest pain                                                  | Troponin elevation: 3<br>Worsening HFpEF: 1<br>Atrial fibrillation: 2 | 57    |
| PT 4<br>85 M: Troponin elevation, LVEF decrease*                                                                             | Combined (septic, cardiogenic) shock       | Cycle 12 | Upfront         | WBC:<br>0.3<br>Hb: 10<br>Pit: 8       | PR                             | 200mg (fluconazole)                         | Yes – q6wk cycle starting C7 due to cytopenia | No                                                         | Hypotension, tachycardia                                    | Troponin elevation: 4<br>LVEF: 5                                      | 15-20 |
| PT 5<br>56 M: Pericardial effusion                                                                                           | Chronic, asymptomatic pericardial effusion | Cycle 1  | Upfront         | WBC:<br>0.5<br>Hb:<br>6.6<br>Pit: 5   |                                | 200mg (fluconazole)                         | No                                            | No                                                         |                                                             | 2                                                                     | 74    |
| PT 6<br>47 F: LVEF decrease                                                                                                  | Dyspnea, symptomatic HFrEF                 | Cycle 1  | R/R             | WBC:<br><0.1<br>Hb:<br>6.7<br>Pit: 29 |                                | 100mg (posaconazole)                        | No                                            | Aspergillus pneumonia, Rothia/ Stenotrophomonas bacteremia |                                                             | 3                                                                     | 35    |
| PT 7<br>71 M: LVEF decrease                                                                                                  | Cardiogenic shock                          | Cycle 1  | R/R             | WBC:<br>0.8<br>Hb:<br>7.1<br>Pit: 24  |                                | 200mg (fluconazole)                         | No                                            | Mucorales                                                  |                                                             | 5                                                                     | 55    |

|                                                                                               |                                       |         |         |                                           |                                  |                                             |                                               |                                                               |  |                                              |    |
|-----------------------------------------------------------------------------------------------|---------------------------------------|---------|---------|-------------------------------------------|----------------------------------|---------------------------------------------|-----------------------------------------------|---------------------------------------------------------------|--|----------------------------------------------|----|
| PT 8<br>68 F:<br>Cardiogenic<br>pulmonary<br>edema                                            | Neutropenic<br>fever                  | Cycle 1 | R/R     | WBC:<br>0.4<br>Hb:<br>6.9<br>Plt: 8       |                                  | 200mg<br>(fluconazole)                      | No                                            | Culture negative<br>neutropenic fever                         |  | 3                                            | 68 |
| PT 9<br>40 M:<br>Myopericarditis                                                              | Chest pain,<br>dyspnea                | Cycle 5 | R/R     | WBC:<br>0.8<br>Hb:<br>8.4<br>Plt: 21      | Primary<br>refractory<br>disease | 100mg<br>(posaconazole)                     | No                                            | No                                                            |  | 2                                            | 61 |
| PT 10<br>61 M: Atrial<br>fibrillation with<br>rapid ventricular<br>response,<br>Pericarditis* | Septic shock                          | Cycle 3 | R/R     | WBC:<br>3<br>Hb: 8<br>Plt: 11             | Primary<br>refractory<br>disease | 100mg<br>(posaconazole)                     | No                                            | Pneumonia with septic<br>shock                                |  | Atrial<br>fibrillation: 3<br>Pericarditis: 2 | 61 |
| PT 11<br>74 F:<br>Cardiogenic<br>pulmonary<br>edema                                           | Admission<br>for Pain<br>control      | Cycle 1 | R/R     | WBC:<br>6.9<br>Hb:<br>4.6<br>Plt: 43      |                                  | 200mg<br>(fluconazole)                      | No                                            | No                                                            |  | 1                                            | 68 |
| PT 12<br>79 F: Worsening<br>HFpEF                                                             | Not admitted                          | Cycle 2 | R/R     | WBC:<br>3.5<br>Hb:<br>7.5<br>Plt: 51      | CR                               | 200mg<br>(fluconazole), 14-<br>day cycle    | No                                            | No                                                            |  | 1                                            | 62 |
| PT 13<br>72 M: Worsening<br>CAD*                                                              | Failure to<br>thrive                  | Cycle 3 | Upfront | WBC:<br>0.8<br>Hb: 7<br>Plt: 11           | CR                               | 100mg<br>(posaconazole)                     | Yes- C3<br>delayed by 2<br>wks<br>(infection) | ESBL E. Coli                                                  |  | 2                                            | 71 |
| PT 14<br>75 F: LVEF<br>decrease                                                               | Heart failure                         | Cycle 2 | Upfront | WBC:<br>6.2<br>Hb:<br>10.5<br>Plt:<br>247 | CR                               | 100mg<br>(posaconazole)                     | No                                            | No                                                            |  | 3                                            | 55 |
| PT 15<br>58 M: Atrial<br>fibrillation with<br>rapid ventricular<br>response *                 | Respiratory<br>and cardiac<br>failure | Cycle 1 | R/R     | WBC:<br>5.9<br>Hb:<br>8.2<br>Plt: 7       |                                  | 100mg<br>(posaconazole)                     | 2 days<br>decitabine                          | Culture negative<br>neutropenic fever                         |  | 5                                            | 55 |
| PT 16<br>72 M:<br>Cardiogenic<br>pulmonary<br>edema*                                          | Anemia                                | Cycle 1 | Upfront | WBC:<br>3.1<br>Hb:<br>6.3<br>Plt: 67      |                                  | 200mg<br>(fluconazole)                      | 3 doses<br>Dacogen<br>(held for<br>rising Cr) | Culture negative<br>(Aspergillus Ag +)<br>febrile neutropenia |  | 5                                            | 74 |
| PT 17<br>77 M: Other<br>symptomatic                                                           | Renal failure                         | Cycle 1 | Upfront | WBC:<br>0.3<br>Hb:<br>7.5                 |                                  | 200mg (due to<br>fluconazole,<br>diltiazem) |                                               | No                                                            |  | 2                                            | 63 |

|                                                                                                          |                                  |         |         |                                 |              |                      |                                                 |                                    |                                             |                                               |       |
|----------------------------------------------------------------------------------------------------------|----------------------------------|---------|---------|---------------------------------|--------------|----------------------|-------------------------------------------------|------------------------------------|---------------------------------------------|-----------------------------------------------|-------|
| arrhythmia (SVT)                                                                                         |                                  |         |         | Pt: 10                          |              |                      |                                                 |                                    |                                             |                                               |       |
| PT 18<br>70 M: NSTEMI type 1*                                                                            | Chest pain                       | Cycle 1 | Upfront | WBC: 1.9<br>Hb: 8<br>Pt: 24     |              | 200mg (fluconazole)  | No                                              | Culture negative neutropenic fever |                                             | 3                                             | 63    |
| PT 19<br>68 M: Troponin elevation, LVEF decrease *                                                       | Heart failure                    | Cycle 3 | R/R     | WBC: 12.2<br>Hb: 8.2<br>Pt: 230 | CR           | 100mg (posaconazole) | No                                              | No                                 | Dyspnea                                     | Troponin elevation: 2<br>LVEF: 5              | 35    |
| PT 20<br>84F: Other symptomatic arrhythmia (recurrent narrow complex tachycardia)                        | Azacitidine + venetoclax ramp-up | Cycle 1 | Upfront | WBC: 1.8<br>Hb: 7.6<br>Pt: 35   |              | 200mg (fluconazole)  | No                                              | No                                 |                                             | 2                                             | 65    |
| PT 21<br>80 M: Atrial fibrillation with rapid ventricular response <sup>1</sup> , cardiopulmonary arrest | Out of hospital arrest           | Cycle 7 | Upfront | WBC: 0.6<br>Hb: 6.1<br>Pt: 13   | CRi MRD+     | 200mg (fluconazole)  | 25% decitabine dose reduction for pancytopenia  | No                                 |                                             | Cardiopulmonary arrest: 5<br>Afib with RVR: 2 | 60    |
| PT 22<br>73 F: Worsening HFpEF                                                                           | Not admitted; pleural effusion   | Cycle 2 | Upfront | WBC: 3.3<br>Hb: 7.8<br>Pt: 22   | Not assessed | 200mg (fluconazole)  | No                                              | No                                 |                                             | 1                                             | 68    |
| PT 23<br>86 F: RV dysfunction                                                                            | Not admitted; incidental finding | Cycle 5 | Upfront | WBC: 3.6<br>Hb: 13<br>Pt: 212   | CR           | 200mg (fluconazole)  | Yes- start C5, 3 days aza and spaced to 6 weeks | No                                 | Echo obtained for dyspnea, pleural effusion | 1                                             | >60   |
| PT 24<br>67 F: Cardiopulmonary arrest                                                                    | Femur fracture                   | Cycle 2 | Upfront | WBC: 0.2<br>Hb: 8.1<br>Pt: 10   | Not assessed | 200mg (fluconazole)  | No                                              | No                                 |                                             | 5                                             | 68    |
| PT 25<br>70 M: Other symptomatic arrhythmia                                                              | Subdural hematoma                | Cycle 5 | Upfront | WBC: 3.3<br>Hb: 8.3<br>Pt: 114  | CR           | 200mg (fluconazole)  | Decitabine only days 1-5 15mg/m2. Ven 14D cycle | No                                 |                                             | 2                                             | 45-50 |
| PT 26                                                                                                    | Sepsis                           | Cycle 2 | Upfront | WBC: 0.5                        | Not assessed | 200mg (fluconazole)  | C2 delayed x 4 wks (Fatigue,                    | Staph Aureus                       | Echo obtained for hypotension               | Worsening HFpEF: 3                            | 72    |

|                                                                                                   |                      |                     |         |                                  |     |                                                                   |                      |                                      |                                                        |                                                        |       |
|---------------------------------------------------------------------------------------------------|----------------------|---------------------|---------|----------------------------------|-----|-------------------------------------------------------------------|----------------------|--------------------------------------|--------------------------------------------------------|--------------------------------------------------------|-------|
| 78 F: Worsening HFpEF, RV dysfunction                                                             |                      |                     |         | WBC: 6.8<br>Plt: 26              |     |                                                                   |                      |                                      |                                                        | RV dysfunction: 3                                      |       |
| PT 27<br>88 M: LVEF decrease, Atrial fibrillation with rapid ventricular response, RV dysfunction | Tumor lysis syndrome | Cycle 1             | Upfront | WBC: 17.6<br>Hb: 9.1<br>Plt: 25  |     | 100mg, then held day 13 for severe thrombocytopenia (fluconazole) | No                   | No                                   | Echo obtained for hypotension, new atrial fibrillation | LVEF: 3<br>RV dysfunction: 3<br>Atrial fibrillation: 3 | 45-50 |
| PT 28<br>62 F: LVEF decrease *                                                                    | Pleural effusion     | Cycle 1             | R/R     | WBC: 0.7<br>Hb: 6.9<br>Plt: 34   |     | 200mg (fluconazole)                                               | No                   | Culture negative febrile neutropenia |                                                        | 5                                                      | 40    |
| PT 29<br>82 M: Atrial fibrillation with rapid ventricular response, troponin elevation*           | COVID                | Cycle 2,<br>Cycle 3 | Upfront | WBC: 27.6<br>Hb: 8.5<br>Plt: 261 | PR  | 200mg (fluconazole)                                               | C3 delayed for COVID | No                                   | Chest pain                                             | Atrial fibrillation: 4<br>Troponin elevation: 3        | 57    |
| PT 30<br>80 M: Troponin elevation                                                                 | GI Bleed             | Cycle 2             | Upfront | WBC: 0.4<br>Hb: 6.8<br>Plt: 8    | CRi | 200mg (fluconazole), 14-day cycle                                 | No                   | No                                   | Chest pain                                             | 3                                                      | 45-50 |
| PT 31<br>69 M: Troponin elevation, LVEF decrease                                                  | Subdural hematoma    | Cycle 1             | Upfront | WBC: 2.7<br>Hb: 6.8<br>Plt: 8    |     | 200mg (fluconazole)                                               | No                   | Culture negative febrile neutropenia | Chest pain, dyspnea                                    | LVEF: 3<br>Troponin elevation: 2                       | 33    |
| PT 32<br>61 M: Troponin elevation                                                                 | Unstable angina      | Cycle 3             | Upfront | WBC: 1.1<br>Hb: 13.2<br>Plt: 359 | CR  | 200mg (fluconazole)                                               | No                   | No                                   | Chest pain, palpitations                               | 2                                                      | 55    |
| PT 33<br>71 M: NSTEMI type 1                                                                      | NSTEMI type 1        | Cycle 2             | Upfront | WBC: 6.9<br>Hb: 7.6<br>Plt: 312  | PR  | 100mg (posaconazole)                                              | No                   | No                                   |                                                        | 4                                                      | 62    |
| PT 34<br>71 M: LVEF decrease, NSTEMI type 1                                                       | NSTEMI type 1        | Cycle 1             | Upfront | WBC: 0.9<br>Hb: 8.7<br>Plt: 28   |     | 200mg (fluconazole)                                               | No                   | No                                   |                                                        | NSTEMI: 4<br>LVEF decrease: 3                          | 40    |

\*=admission to Intensive Care Unit or Cardiac Intensive Care Unit. R/R: HMA + venetoclax used for relapsed or refractory AML. Status of AML assessed for all patients beyond cycle 1 per 2017 ELN response criteria. CR: complete response. CRi: complete response with incomplete hematologic recovery. PR: partial response. MRD: minimal residual disease. EF=ejection fraction. All cardiac events graded per Common Terminology Criteria for Adverse Events (CTCAE), version 5.0. Troponin elevation graded in category ‘myocardial infarction.’

† = non-concurrent cardiac events; event demarcated by † preceded other cardiac events

**Supplemental Table 2. Details of nine fatal cardiac events**

| Type of event:                                                                                      | Cause of death:                              |
|-----------------------------------------------------------------------------------------------------|----------------------------------------------|
| PT 2<br>92 M: LVEF decrease, Atrial fibrillation w/ RVR,<br>other symptomatic arrhythmia            | Non-perfusing arrhythmia                     |
| PT 4<br>85 M: Troponin elevation, LVEF decrease                                                     | Heart failure with reduced ejection fraction |
| PT 7<br>71 M: LVEF decrease                                                                         | Cardiogenic shock                            |
| PT 15<br>58 M: Atrial fibrillation w/ RVR                                                           | Non-perfusing arrhythmia                     |
| PT 16<br>72 M: Cardiogenic pulmonary edema                                                          | Respiratory failure due to pulmonary edema   |
| PT 19<br>68 M: Troponin elevation, LVEF decrease                                                    | Respiratory failure                          |
| PT 21<br>80 M: Atrial fibrillation w/ rapid ventricular response<br>(prior), cardiopulmonary arrest | Out-of-hospital arrest                       |
| PT 24<br>67 F: Cardiopulmonary arrest                                                               | In-hospital arrest                           |
| PT 28<br>62 F: LVEF decrease                                                                        | Respiratory failure due to pulmonary edema   |

**Supplemental Figure 1. Cumulative incidence of cardiac events in AML patients treated with HMA + venetoclax vs. AML patients treated with HMA alone.**

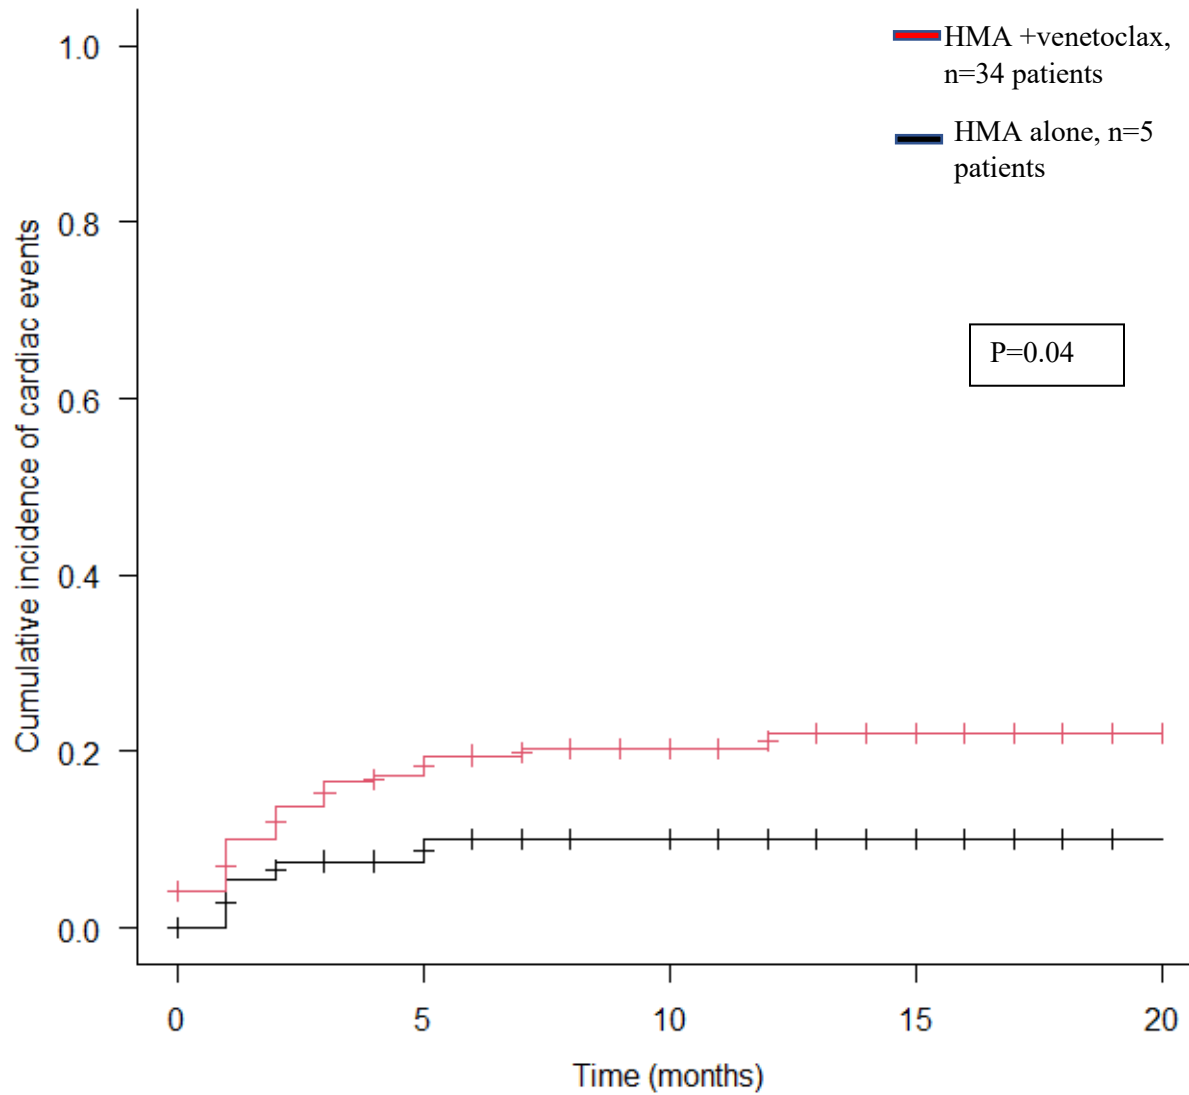

Supplement: advancesADV2022007333-suppl1.pdf [file advancesADV2022007333-suppl1.pdf]
